# Supplementary material for: Epigenetic And Transcriptomic Alterations in Offspring Born To Women With Type 1 Diabetes (The EPICOM Study)
Source: Research Square preprint supplement (doi:10.21203/rs.3.rs-1046258/v1), 2021-11-18
Supplement: Supplementary file 1 [file 2c518d960b34a93226807625.xlsx]

## Sheet: Ark1
Gene-ID	Log Fold Change	LogCPM	Pvalue	Database	HGNC
G059310	0.773117895428039	3.31068	0.000596957078648438	mitranscriptome	G059310
ENSG00000211849.1	-0.413194010727959	2.57294	0.000767751018662858	gencode	TRAJ40
G066871	-0.399497534843628	5.92214	0.000908891671545425	mitranscriptome	G066871
G000264	0.682800508415206	1.76779	0.00143175502120542	mitranscriptome	G000264
ENSG00000229241.1	-0.474436193804914	1.81189	0.00144623772288484	gencode	PNPT1P1
ENSG00000272182.1	-0.391746519182456	1.85431	0.00154542036857479	gencode	RP11-802O23.3
ENSG00000232542.1	-0.365779407489179	2.09651	0.00193871727829378	gencode	DPYD-IT1
ENSG00000254481.1	0.482180445571688	1.76151	0.00220179206193732	gencode	PTP4A2P2
ENSG00000240869.2	0.970703113905776	1.80787	0.0023565800118564	gencode	RN7SL128P
ENSG00000211745.3	-0.769129280074103	1.6478	0.00245152012531713	gencode	TRBV4-2
G024353	-0.391176795399792	1.7492	0.00272355830497447	mitranscriptome	G024353
ENSG00000233040.2	-0.344182260032657	2.28033	0.00301178935400456	gencode	FAM204BP
ENSG00000263740.1	0.844245187842142	8.93389	0.00311730144439153	gencode	RN7SL4P
ENSG00000213763.4	0.533353912768699	3.0429	0.00333834262877152	gencode	ACTBP2
G022009	-0.651159629048168	2.4146	0.00338852337564948	mitranscriptome	G022009
G051442	-1.48398	8.21808	0.0039935959129157	mitranscriptome	G051442
ENSG00000254272.1	-0.355806289709758	2.59384	0.00406172503133543	gencode	RP11-382J24.2
ENSG00000183444.10	-0.394255391917217	1.9543	0.00439965393914671	gencode	OR7E38P
G042225	-0.489284726727441	1.52687	0.00447841742694468	mitranscriptome	G042225
ENSG00000228224.3	0.454773567058633	3.57687	0.00459303727132604	gencode	NACAP1
